# Supplementary material for: A Study of the Adsorption Properties of Individual Atoms on the Graphene Surface: Density Functional Theory Calculations Assisted by Machine Learning Techniques
Source: MDPI journal article supplement (doi:10.3390/ma17061428), 2024-03-20
Supplement: s1 [file s1]

## Supplemental Information

# A study of the adsorption properties of individual atoms on the graphene surface: machine learning accelerated density functional theory

Jingtao Huang <sup>1</sup>, Mo Chen <sup>1</sup>, Jingteng Xue <sup>1</sup>, Mingwei Li <sup>2</sup>, Yuan Cheng <sup>3</sup>,

Zhonghong Lai <sup>4</sup>, Jin Hu <sup>1</sup>, Fei Zhou <sup>5</sup>, Nan Qu <sup>1,\*</sup>, Yong Liu <sup>1,2,\*</sup>,<sup>†</sup> and Jingchuan Zhu <sup>1,\*</sup>,<sup>†</sup>

<sup>1</sup> School of Materials Science and Engineering, Harbin Institute of Technology, Harbin 150001, China;  
20b909032@stu.hit.edu.cn (J.H.); lixlion@163.com (M.C.); xuejingteng.cn@gmail.com (J.X.);  
hujin@hit.edu.cn (J.H.)

<sup>2</sup> National Key Laboratory for Precision Hot Processing of Metals, Harbin Institute of Technology,  
Harbin 150001, China; limingwei@hit.edu.cn

<sup>3</sup> National Key Laboratory of Science and Technology on Advanced Composites in Special Environments,  
Harbin Institute of Technology, Harbin 150001, China; cy6810@hit.edu.cn

<sup>4</sup> Center for Analysis, Measurement and Computing, Harbin Institute of Technology, Harbin 150001, China;  
zhhlai@hit.edu.cn

<sup>5</sup> State Key Laboratory for Environment-Friendly Energy Materials, School of Materials Science and Engineering,  
Southwest University of Science and Technology, Mianyang 621010, China; fei\_flyfly@163.com

\* Correspondence: qunan@hit.edu.cn (N.Q.); lyonghit@hit.edu.cn (Y.L.); fgms@hit.edu.cn (J.Z.)

<sup>†</sup> These authors contributed equally to this work.

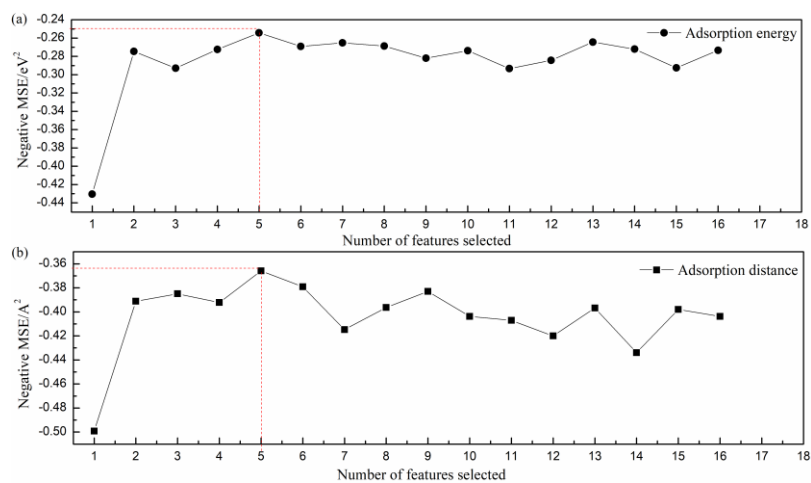

Figure S1. Variation of mean square error with the number of eigenvalues in feature elimination.

Table S1. Final selection of feature values to be used as a machine learning dataset for adsorption distance.

| Atomic Name | Atomic radius | Covalent radius | Electron affinity | 1st ionization energy | 2nd ionization energy | $A_d$ |
|-------------|---------------|-----------------|-------------------|-----------------------|-----------------------|-------|
| H           | 0.79          | 0.32            | 2.2               | 1312                  | 0                     | 2.545 |
| Li          | 2.05          | 1.23            | 0.98              | 520.2                 | 7298.1                | 1.713 |
| B           | 1.17          | 0.82            | 1.92              | 800.6                 | 2427.1                | 1.709 |
| N           | 0.75          | 0.75            | 3.04              | 1402.3                | 2856                  | 3.072 |
| F           | 0.57          | 0.72            | 3.98              | 1681                  | 3374.2                | 2.434 |
| Mg          | 1.72          | 1.36            | 1.31              | 737.7                 | 1450.7                | 3.57  |
| Al          | 1.82          | 1.18            | 1.61              | 577.5                 | 1816.7                | 2.113 |
| S           | 1.09          | 1.02            | 2.58              | 999.6                 | 2252                  | 3.358 |
| Sc          | 2.09          | 1.44            | 1.36              | 633.1                 | 1235                  | 1.981 |
| Ti          | 2             | 1.32            | 1.54              | 658.8                 | 1309.8                | 1.858 |
| V           | 1.92          | 1.22            | 1.63              | 650.9                 | 1414                  | 1.877 |
| Cr          | 1.85          | 1.18            | 1.66              | 652.9                 | 1590.6                | 2.301 |
| Mn          | 1.79          | 1.17            | 1.55              | 717.3                 | 1509                  | 2.116 |
| Fe          | 1.72          | 1.17            | 1.83              | 762.5                 | 1561.9                | 1.518 |
| Co          | 1.67          | 1.16            | 1.88              | 760.4                 | 1648                  | 1.552 |
| Ni          | 1.62          | 1.15            | 1.91              | 737.1                 | 1753                  | 1.565 |
| Cu          | 1.57          | 1.17            | 1.9               | 745.5                 | 1957.9                | 1.933 |
| Zn          | 1.53          | 1.25            | 1.65              | 906.4                 | 1733.3                | 3.468 |
| Ge          | 1.52          | 1.22            | 2.01              | 762                   | 1537.5                | 2.549 |
| Br          | 1.12          | 1.14            | 2.96              | 1139.9                | 2103                  | 3.388 |
| Rb          | 2.98          | 2.16            | 0.82              | 403                   | 2633                  | 2.811 |
| Y           | 2.27          | 1.62            | 1.22              | 600                   | 1180                  | 2.246 |
| Zr          | 2.16          | 1.45            | 1.33              | 640.1                 | 1270                  | 1.989 |
| Nb          | 2.08          | 1.34            | 1.6               | 652.1                 | 1380                  | 1.904 |
| Mo          | 2.01          | 1.3             | 2.16              | 684.3                 | 1560                  | 1.678 |
| Rh          | 1.83          | 1.25            | 2.28              | 719.675               | 1744.45               | 1.873 |
| Sn          | 1.72          | 1.41            | 1.96              | 708.6                 | 1411.8                | 2.729 |
| Sb          | 1.53          | 1.4             | 2.05              | 834                   | 1594.9                | 3.403 |
| Ba          | 2.78          | 1.98            | 0.89              | 502.9                 | 965.2                 | 2.621 |
| Lu          | 2.25          | 1.56            | 1                 | 523.5                 | 1340                  | 2.39  |
| Hf          | 2.16          | 1.44            | 1.3               | 658.5                 | 1440                  | 2.087 |
| Ta          | 2.09          | 1.34            | 1.5               | 761                   | 1500                  | 2.141 |
| W           | 2.02          | 1.3             | 1.7               | 758.764               | 1553.4                | 1.721 |
| Au          | 1.79          | 1.34            | 2.4               | 890.1                 | 1980                  | 3.414 |

Table S2. Final selection of feature values to be used as machine learning dataset for adsorption energy.

| Atomic Name | Covalent radius | Atomic volume | Electron affinity | 1st ionization energy | Group | E      |
|-------------|-----------------|---------------|-------------------|-----------------------|-------|--------|
| H           | 0.32            | 14.4          | 2.2               | 1312                  | 1     | -0.587 |
| Li          | 1.23            | 13.1          | 0.98              | 520.2                 | 1     | -1.801 |
| B           | 0.82            | 4.6           | 1.92              | 800.6                 | 13    | -1.568 |
| N           | 0.75            | 17.3          | 3.04              | 1402.3                | 15    | -3.611 |
| F           | 0.72            | 17.1          | 3.98              | 1681                  | 17    | -2.267 |
| Mg          | 1.36            | 13.97         | 1.31              | 737.7                 | 2     | -0.23  |
| Al          | 1.18            | 10            | 1.61              | 577.5                 | 13    | -1.07  |
| S           | 1.02            | 15.5          | 2.58              | 999.6                 | 16    | -1.465 |
| Sc          | 1.44            | 15            | 1.36              | 633.1                 | 3     | -1.73  |
| Ti          | 1.32            | 10.64         | 1.54              | 658.8                 | 4     | -1.94  |
| V           | 1.22            | 8.78          | 1.63              | 650.9                 | 5     | -1.38  |
| Cr          | 1.18            | 7.23          | 1.66              | 652.9                 | 6     | -0.58  |
| Mn          | 1.17            | 1.39          | 1.55              | 717.3                 | 7     | -0.4   |
| Fe          | 1.17            | 7.1           | 1.83              | 762.5                 | 8     | -1.2   |
| Co          | 1.16            | 6.7           | 1.88              | 760.4                 | 9     | -1.3   |
| Ni          | 1.15            | 6.59          | 1.91              | 737.1                 | 10    | -1.5   |
| Cu          | 1.17            | 7.1           | 1.9               | 745.5                 | 11    | -0.322 |
| Zn          | 1.25            | 9.2           | 1.65              | 906.4                 | 12    | -0.16  |
| Ge          | 1.22            | 13.6          | 2.01              | 762                   | 14    | -0.943 |
| Br          | 1.14            | 23.5          | 2.96              | 1139.9                | 17    | -1.197 |
| Rb          | 2.16            | 55.9          | 0.82              | 403                   | 1     | -1.383 |
| Y           | 1.62            | 19.8          | 1.22              | 600                   | 3     | -1.51  |
| Zr          | 1.45            | 14.1          | 1.33              | 640.1                 | 4     | -2.37  |
| Nb          | 1.34            | 10.87         | 1.6               | 652.1                 | 5     | -1.56  |
| Mo          | 1.3             | 9.4           | 2.16              | 684.3                 | 6     | -0.36  |
| Rh          | 1.25            | 8.3           | 2.28              | 719.675               | 9     | -0.479 |
| Sn          | 1.41            | 16.3          | 1.96              | 708.6                 | 14    | -0.767 |
| Sb          | 1.4             | 18.23         | 2.05              | 834                   | 15    | -0.54  |
| Ba          | 1.98            | 39.24         | 0.89              | 502.9                 | 2     | -1.268 |
| Lu          | 1.56            | 17.78         | 1                 | 523.5                 | 0     | -1.65  |
| Hf          | 1.44            | 13.6          | 1.3               | 658.5                 | 4     | -1.59  |
| Ta          | 1.34            | 10.9          | 1.5               | 761                   | 5     | -1.32  |
| W           | 1.3             | 9.53          | 1.7               | 758.764               | 6     | -0.77  |
| Au          | 1.34            | 10.2          | 2.4               | 890.1                 | 11    | -0.296 |

Table S3. Comparison of adsorption energy results with first-principle calculations by other scholars.

| Atomic species      | O     | Zr    | C     | Ta    | Ni    |
|---------------------|-------|-------|-------|-------|-------|
| This paper          | -2.32 | -2.37 | -1.52 | -1.32 | -1.50 |
| Pasti <sup>S1</sup> | -2.06 | -2.02 | -1.46 | -1.57 | -1.40 |

[S1] I.A. Pasti, A. Jovanovic, A.S. Dobrota, S.V. Mentus, B. Johansson, N.V. Skorodumova, Atomic adsorption on pristine graphene along the Periodic Table of Elements-From PBE to non-local functionals, Applied Surface Science. 436(1) (2018) 433-440.
